# Supplementary material
Source: PubMed Central journal article supplement (PMC4069397)

Supplemental Figure 1.

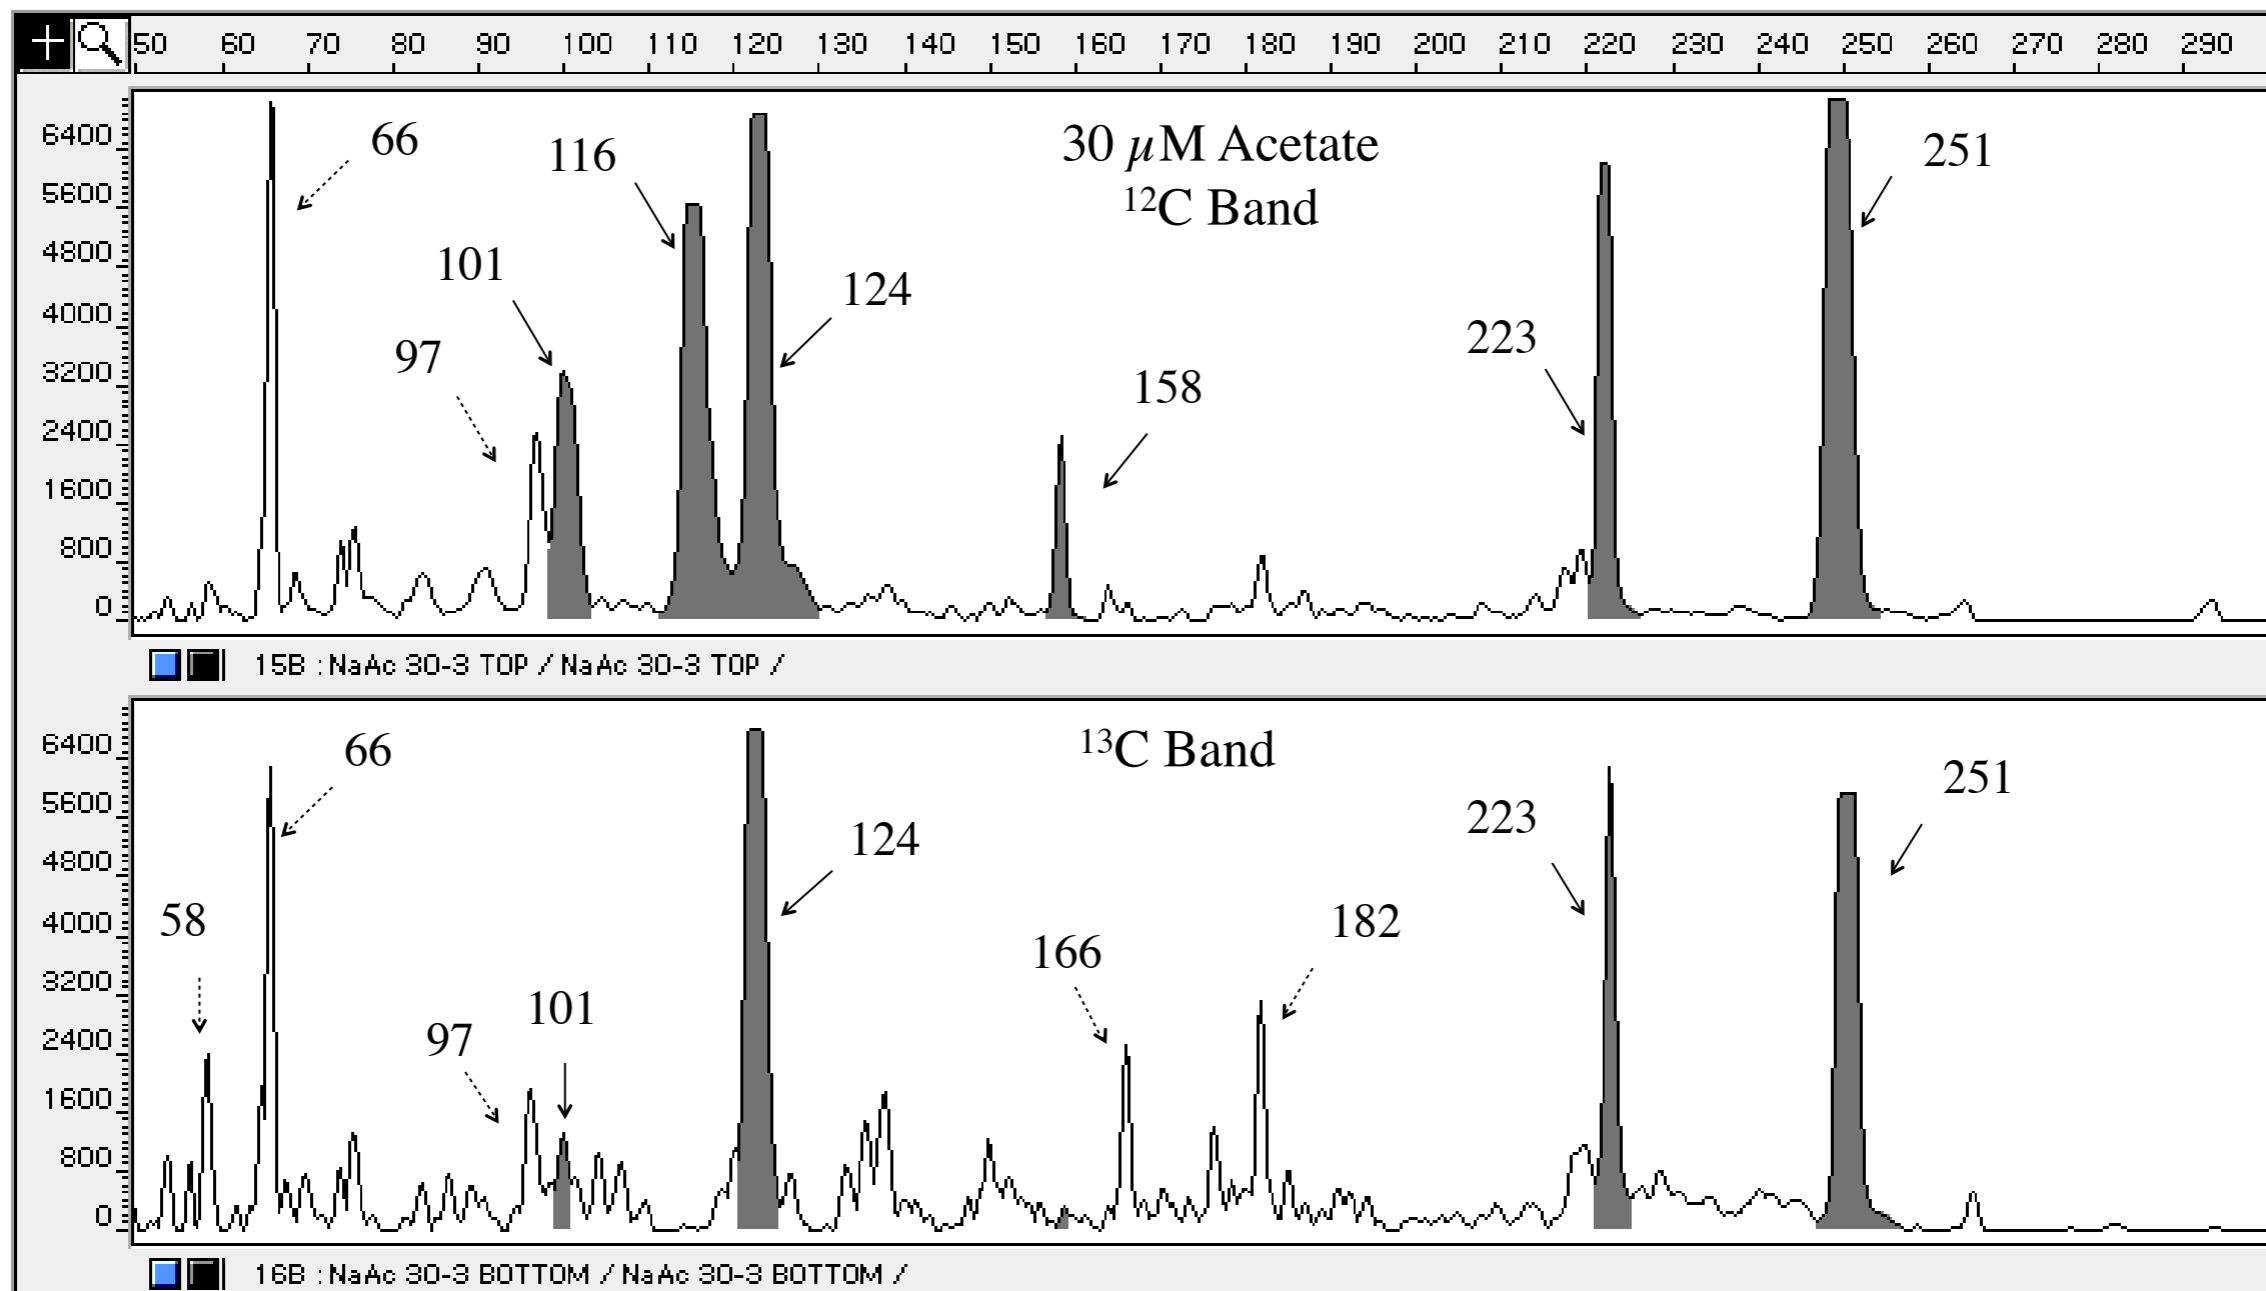

Supplemental Figure 2.

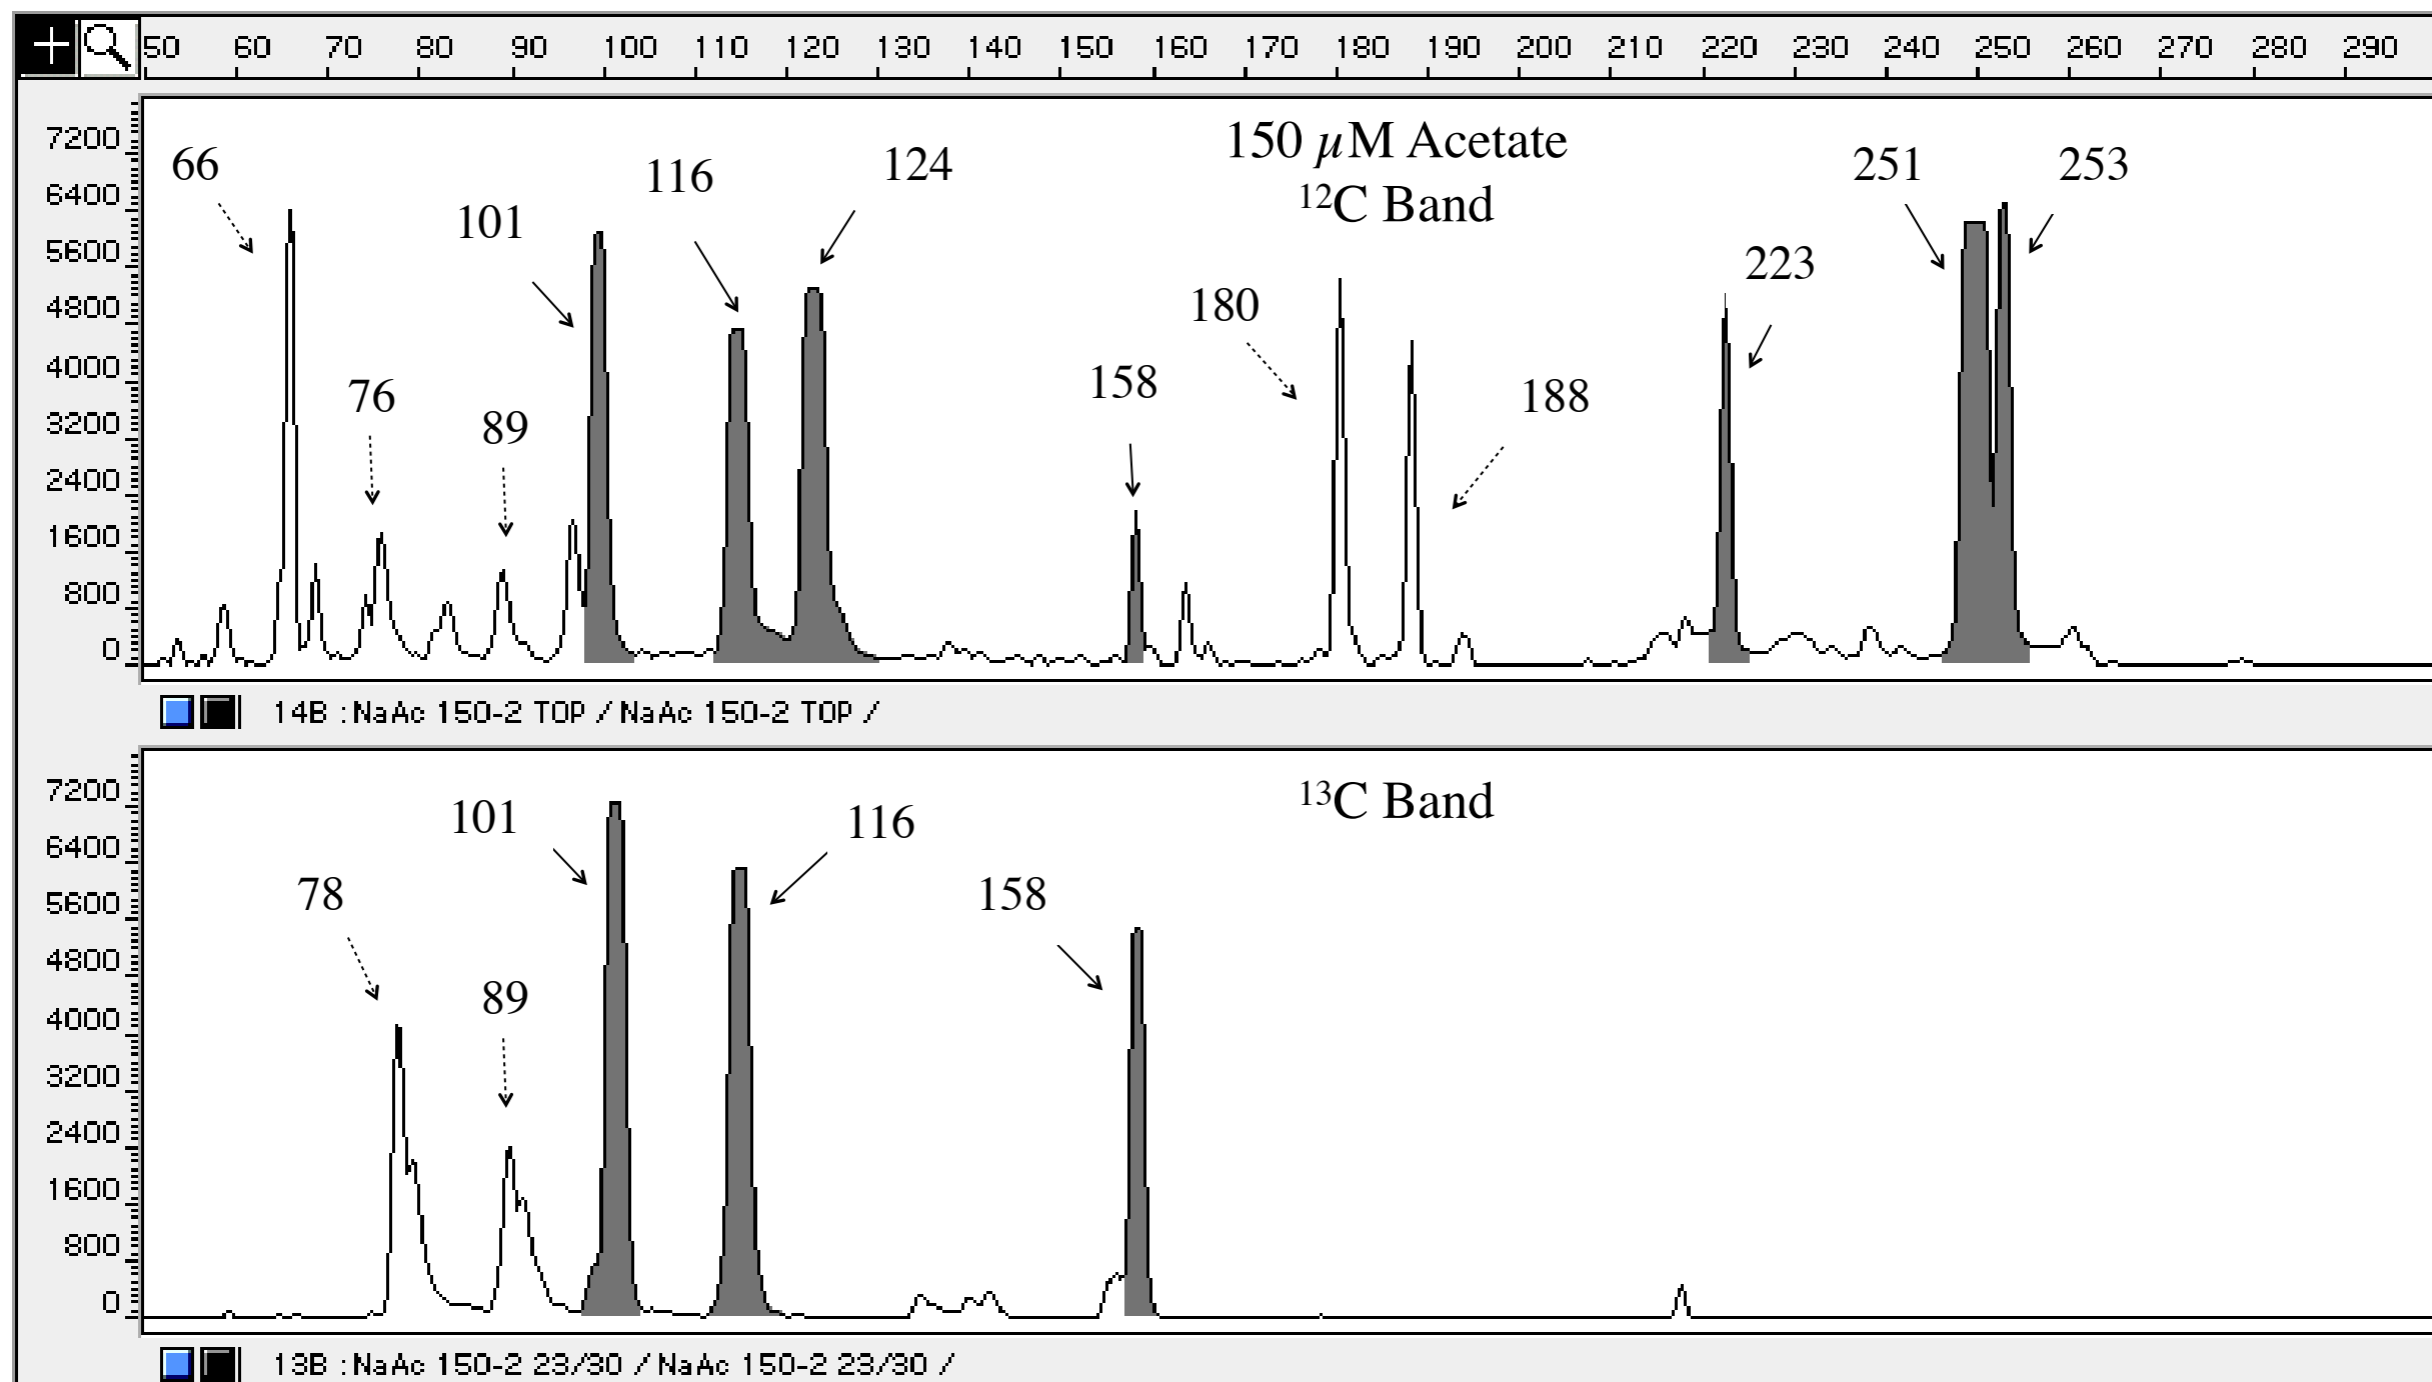

Supplemental Figure 3.

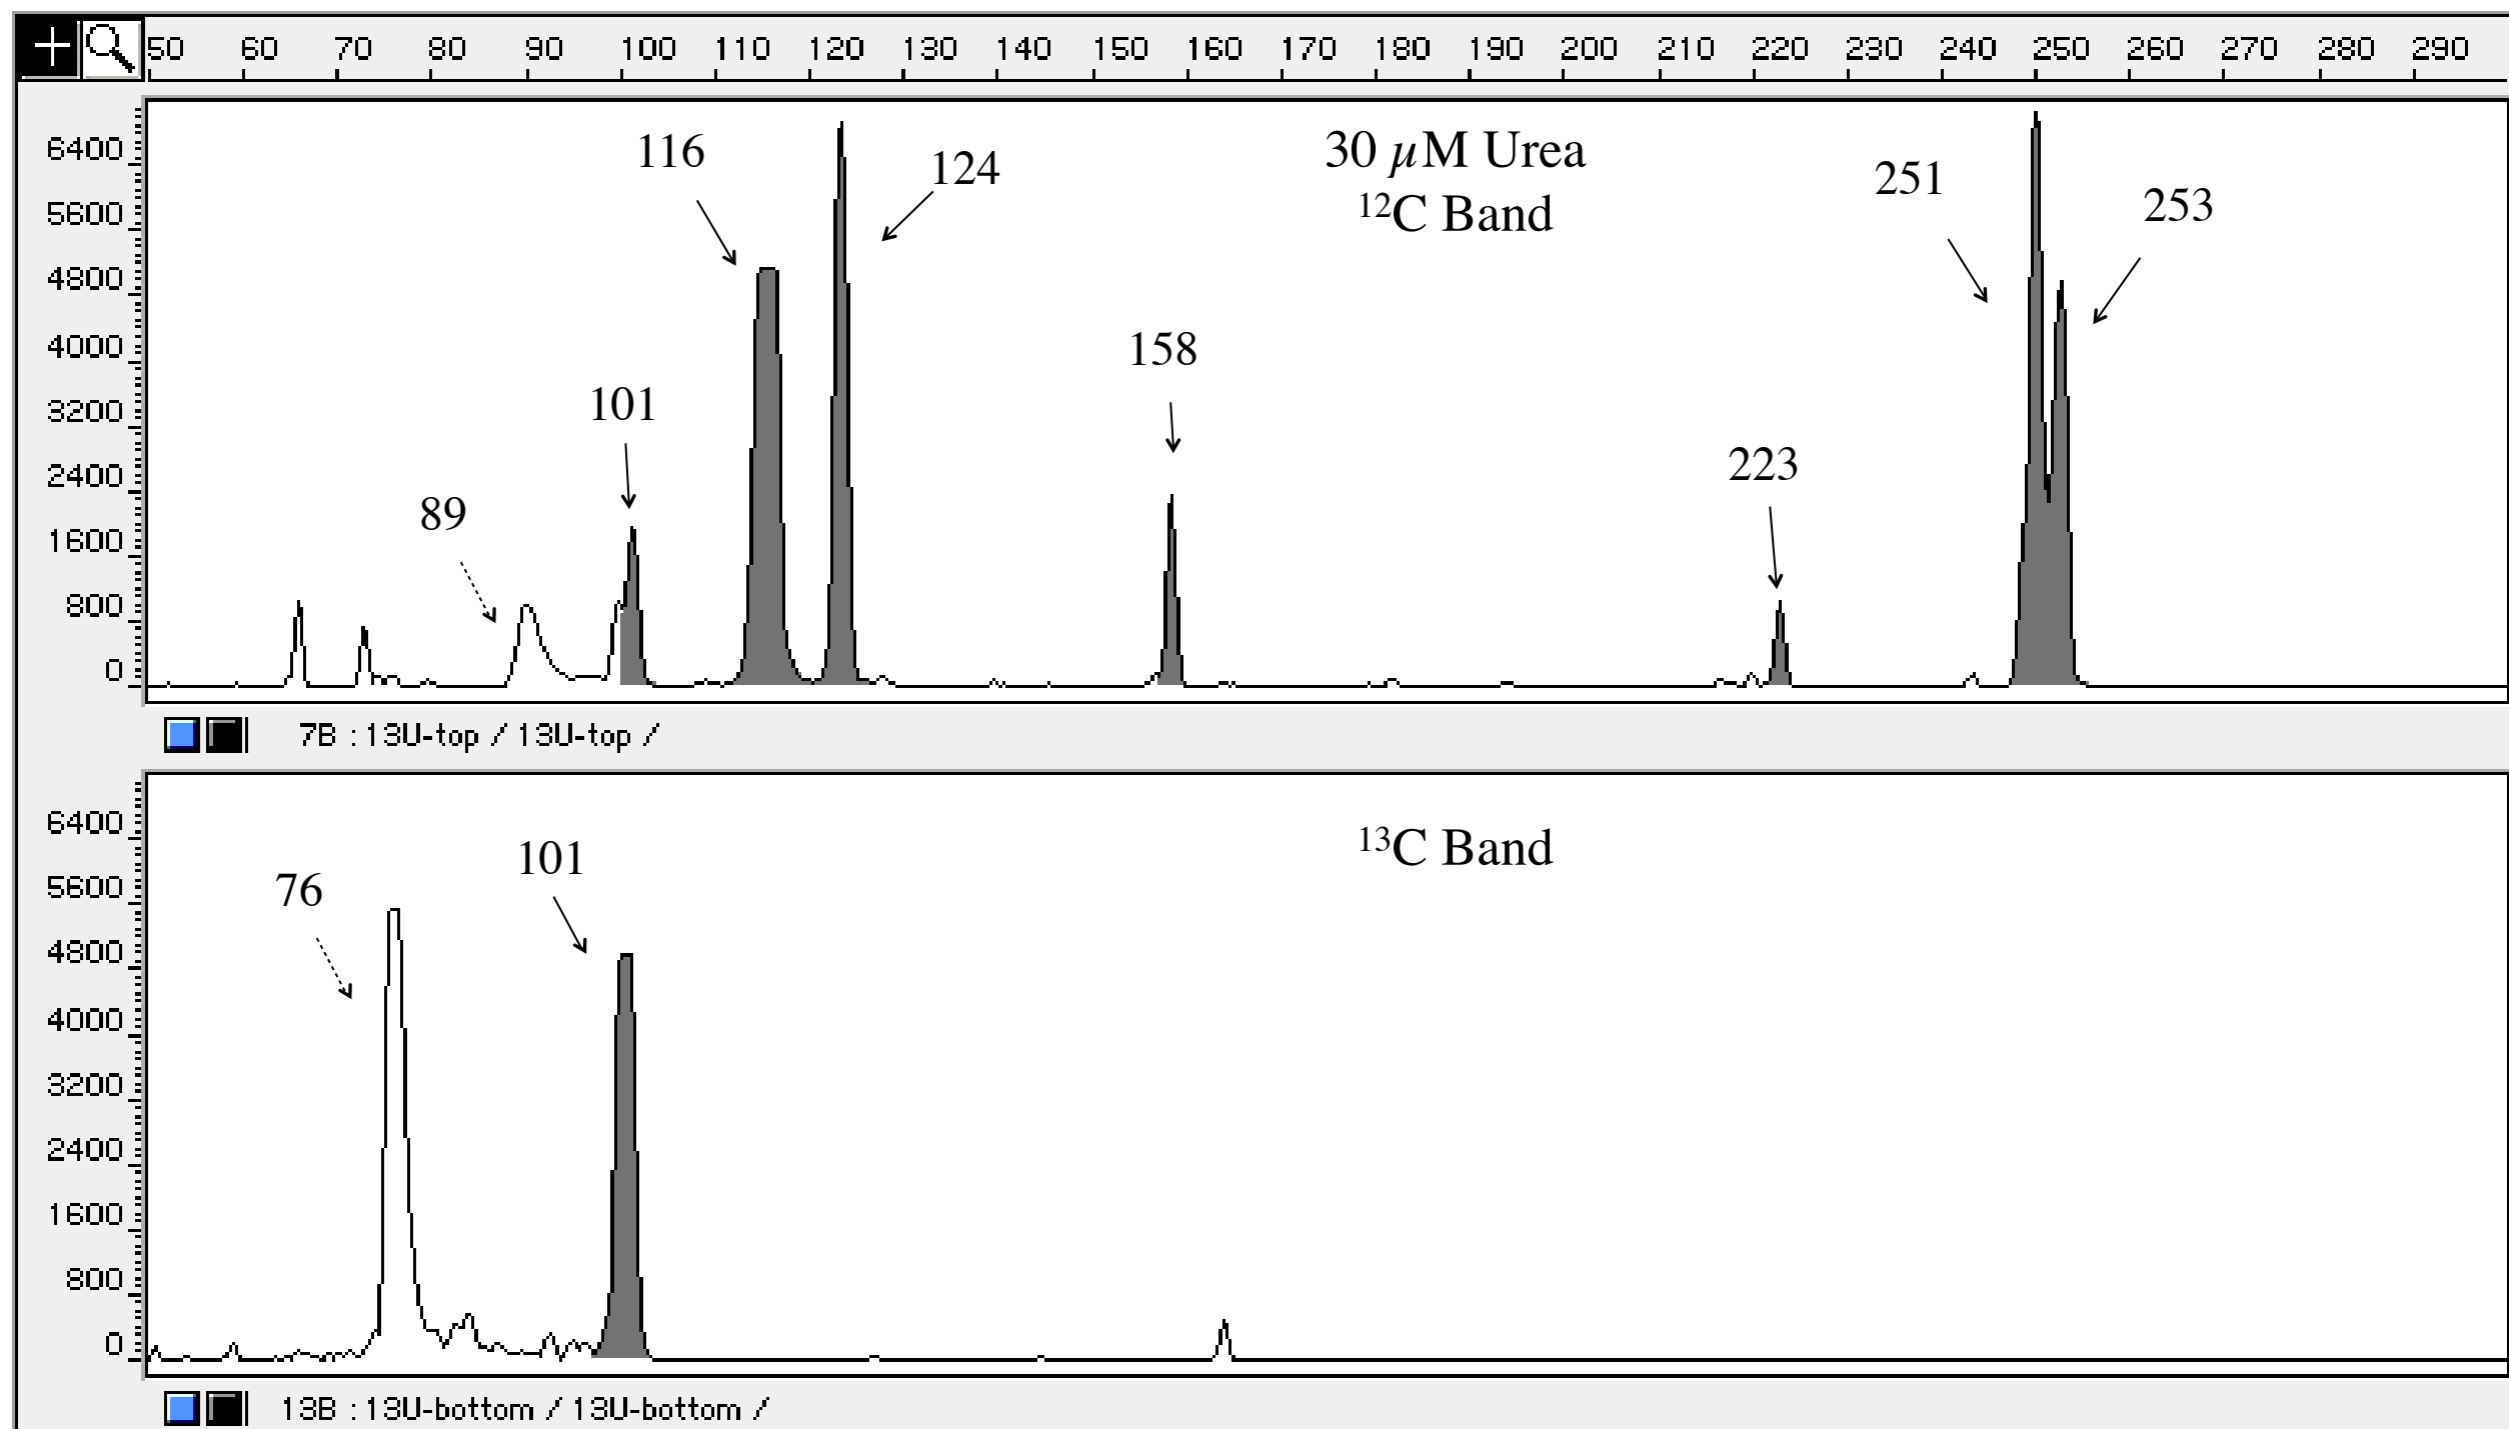

Supplemental Figure 4.

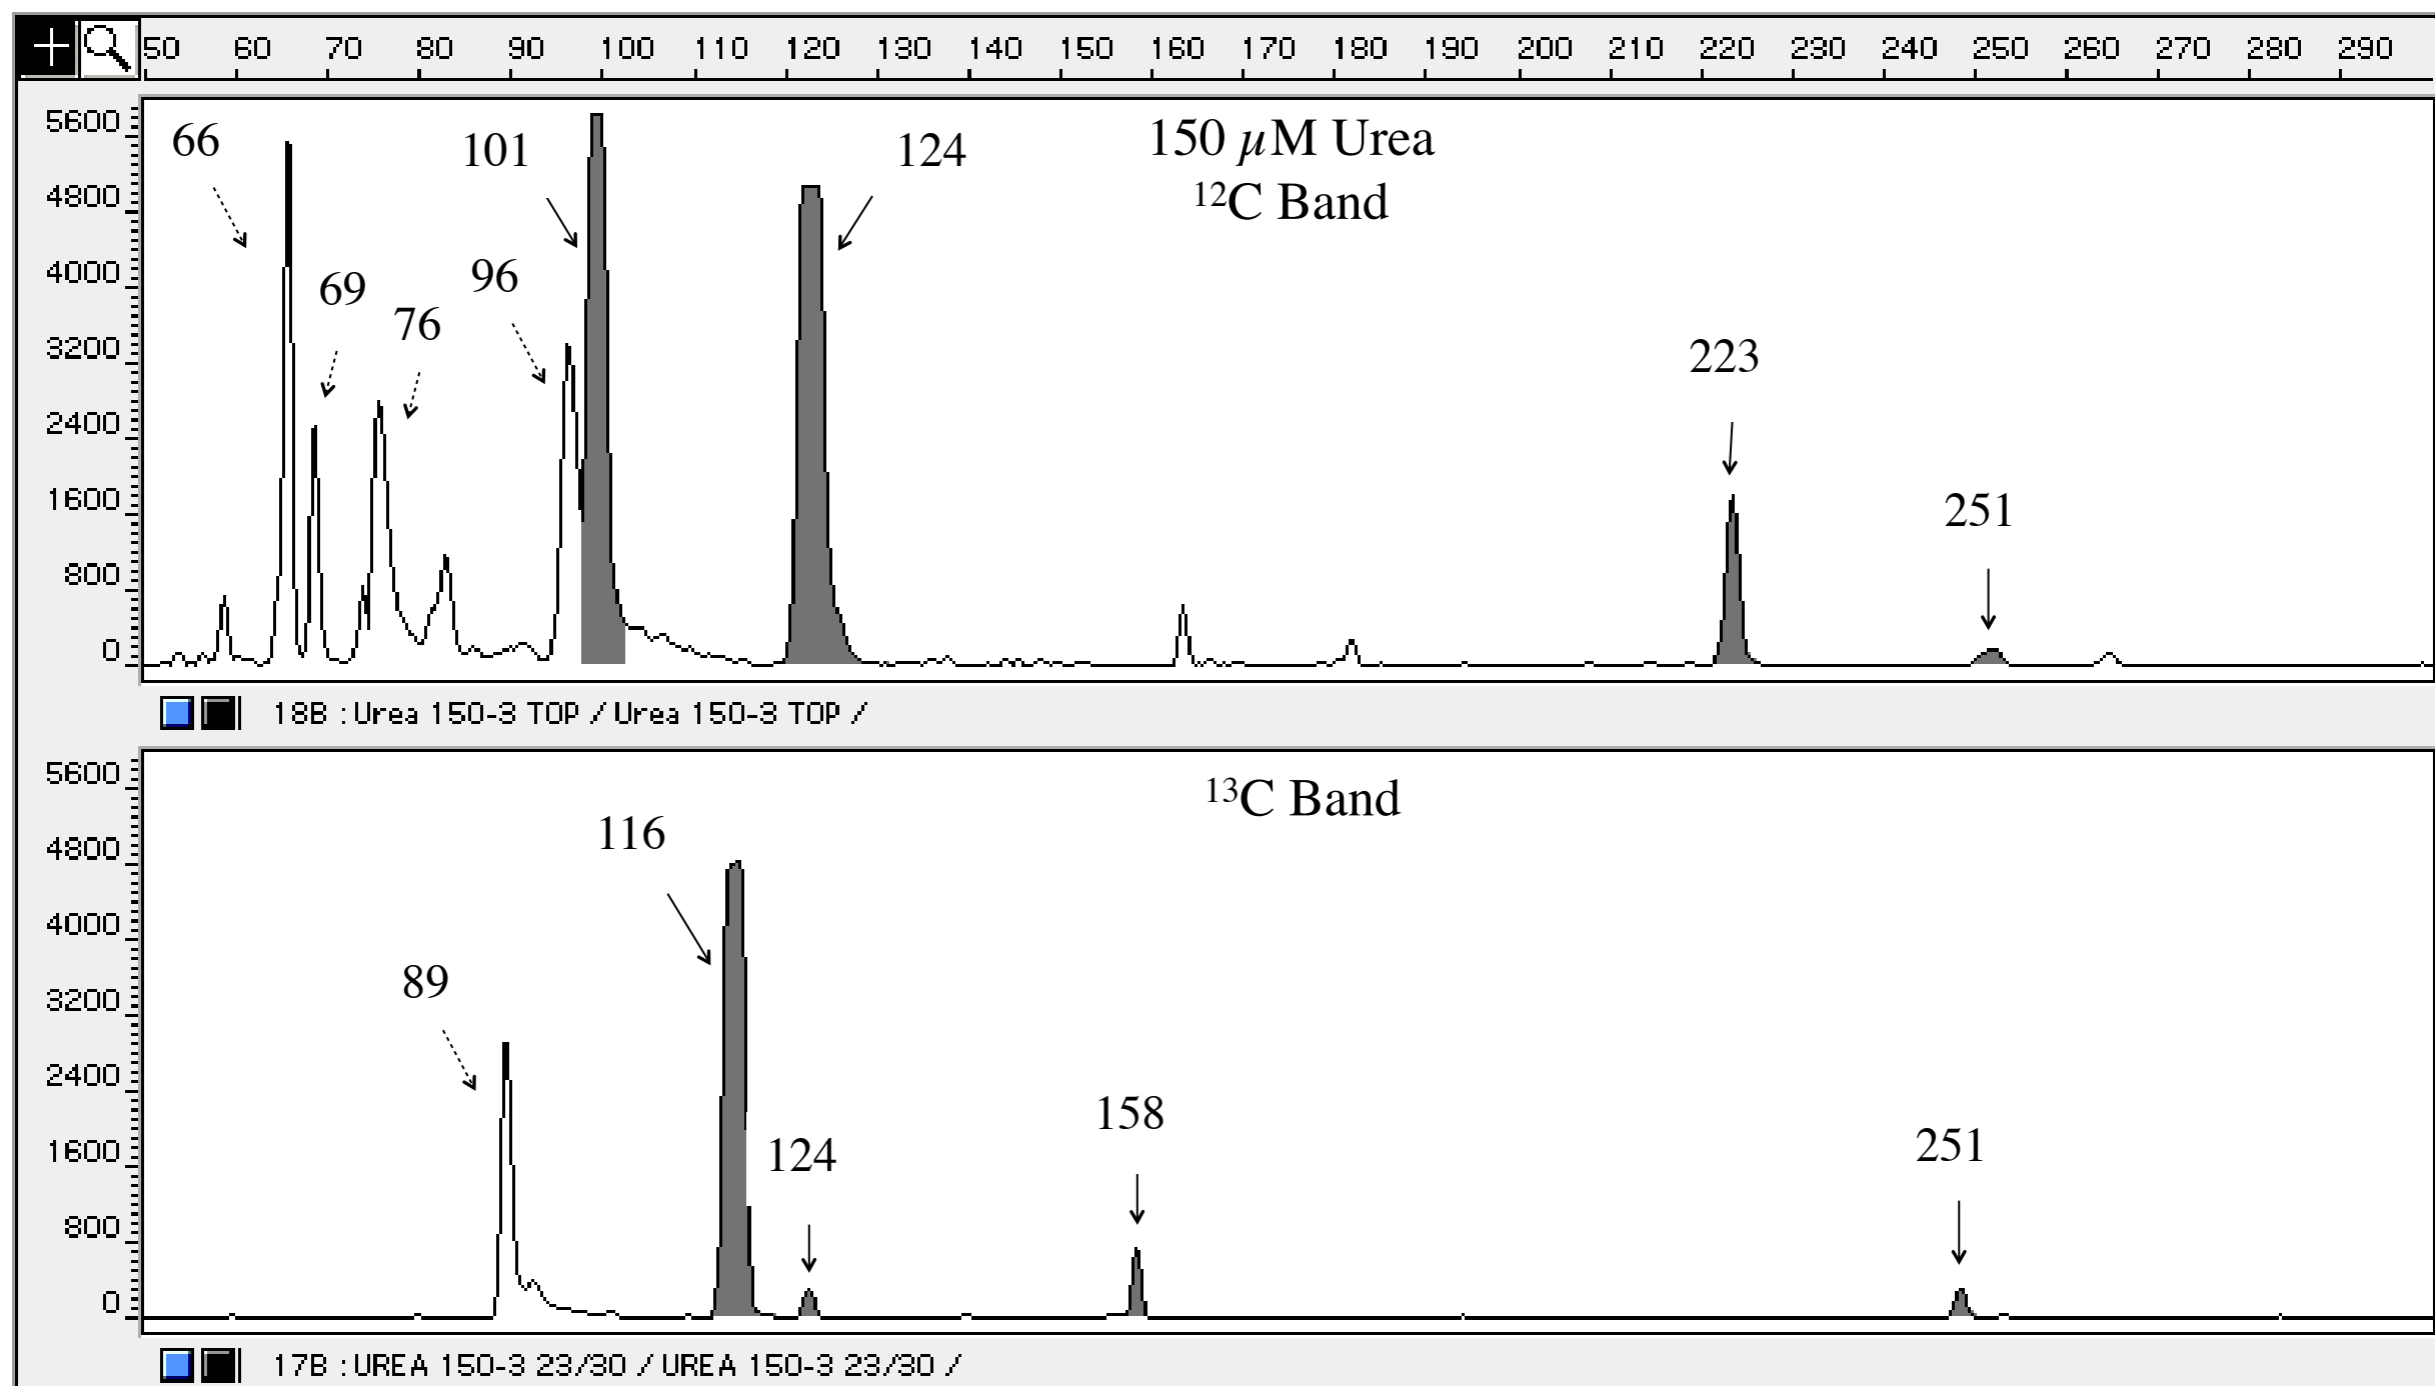

Supplement: ismej201415x1.pdf [file ismej201415x1.pdf]
